# Supplementary material for: Nitrogen-enriched ordered mesoporous carbons through direct pyrolysis in ammonia with enhanced capacitive performance
Source: Royal Society of Chemistry journal article supplement (doi:10.1039/c3ta11342f), 2013-01-01
Supplement: c3ta11342f.pdf [file c3ta11342f.pdf]

Electronic Supplementary Information (ESI)

## Nitrogen-enriched ordered mesoporous carbons through direct pyrolysis in ammonia with enhanced capacitive performance

Xiqing Wang,<sup>\*a,b</sup> Chen-Guang Liu,<sup>b</sup> David Neff,<sup>b</sup> Pasquale F. Fulvio,<sup>a</sup> Richard T. Mayes,<sup>a</sup> Aruna Zhamu,<sup>c</sup> Qing Fang,<sup>b</sup> Guorong Chen,<sup>b</sup> Harry M. Meyer,<sup>d</sup> Bor Z. Jang<sup>\*b</sup> and Sheng Dai<sup>\*a,e</sup>

<sup>a</sup> Chemical Sciences Division, Oak Ridge National Laboratory, Oak Ridge, Tennessee 37831-6201, USA. Fax: 1-865-576-5235; Tel: 1-865-576-7307; E-mail: dais@ornl.gov; xiqing.wang@gmail.com

<sup>b</sup> Nanotek Instruments Inc., 1240 McCook Ave., Dayton, Ohio 45404, USA. Fax: 1-937-558-0606; Tel: 1-937-331-9881; E-mail: bor.jang@wright.edu

<sup>c</sup> Angstrom Materials Inc., 1240 McCook Ave., Dayton, Ohio 45404, USA.

<sup>d</sup> Materials Science and Technology Division, Oak Ridge National Laboratory, Oak Ridge, Tennessee 37831, USA.

<sup>e</sup> Department of Chemistry, University of Tennessee, Knoxville, Tennessee 37996, USA.

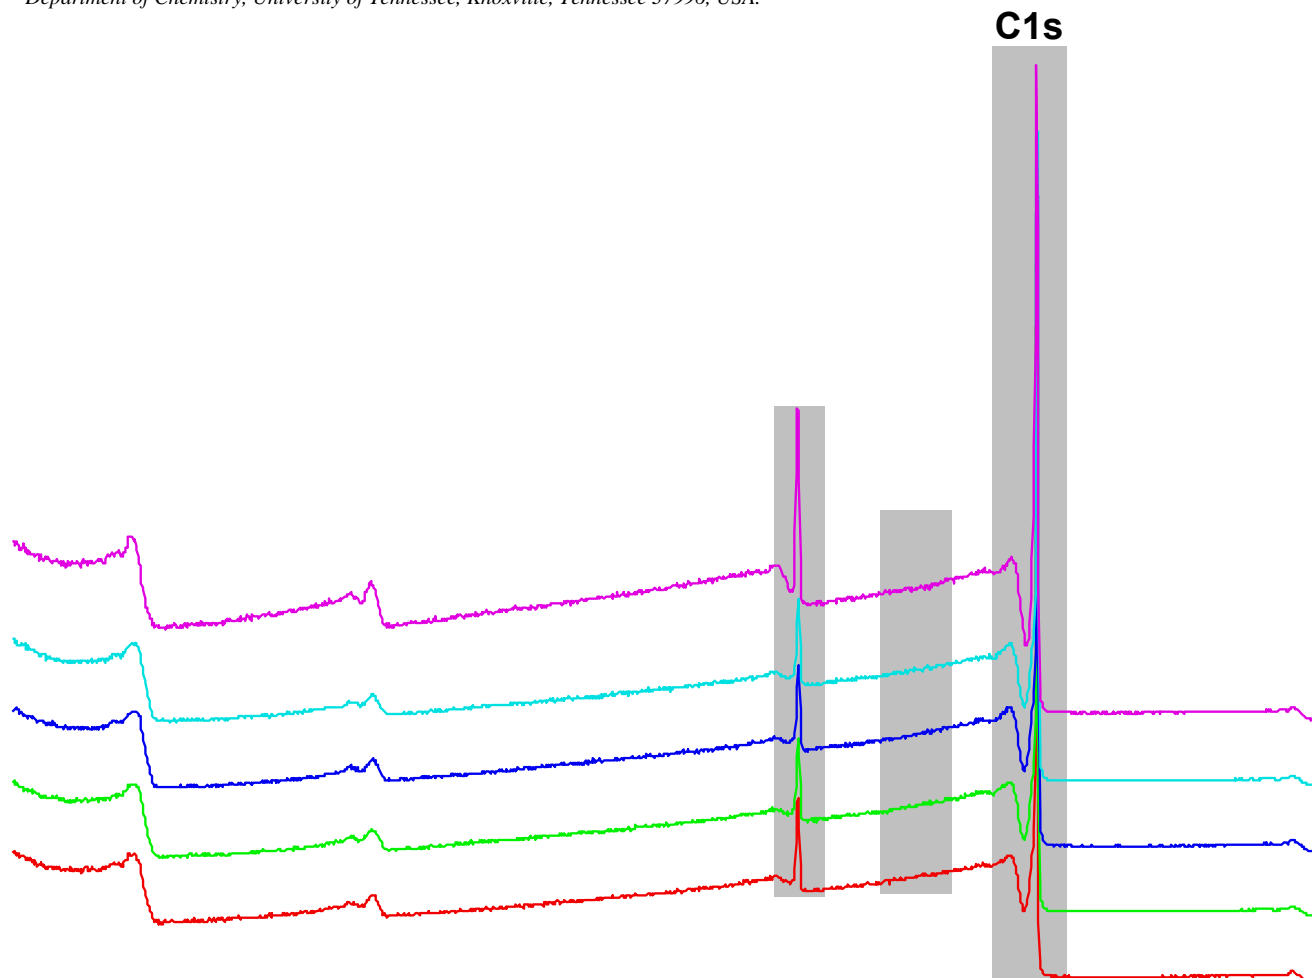

**Fig. S1** XPS spectra of OMC-800-1 (5 survey scans) with non-detectable nitrogen signal (N1s).

Electronic Supplementary Information (ESI)

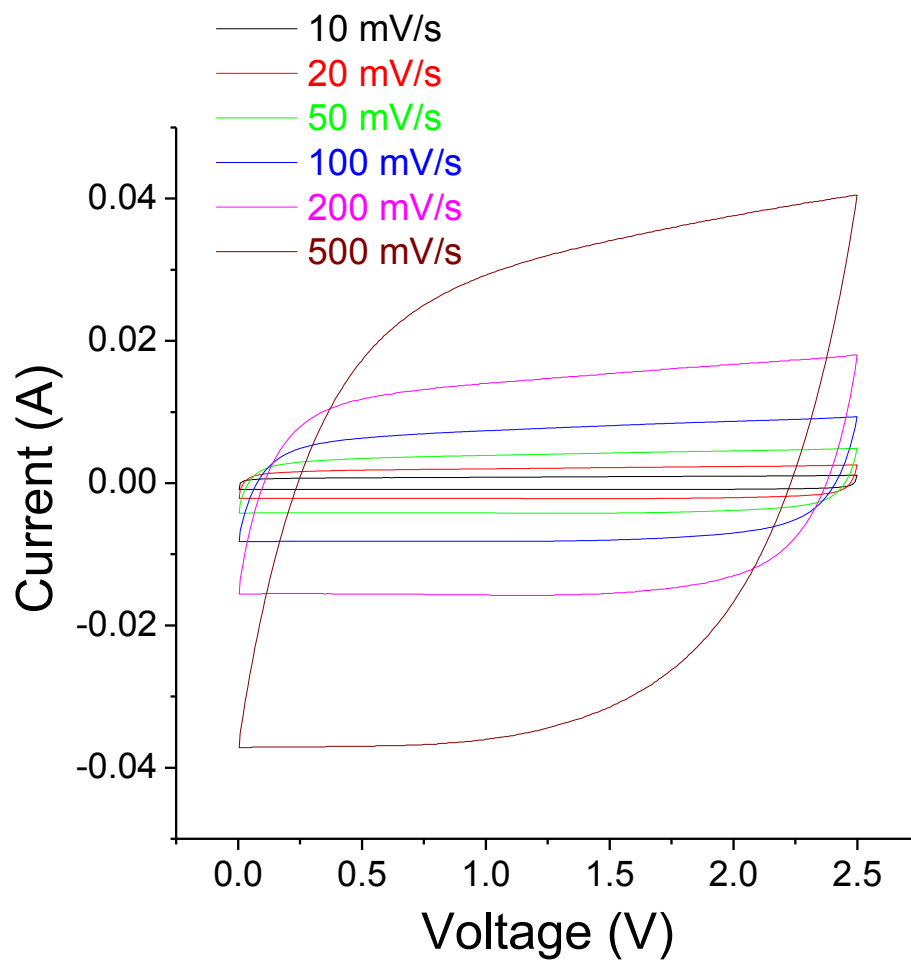

**Fig. S2** Cyclic voltammograms of a symmetric supercapacitor based on N-OMC-800-3 at different scan rates (from 10 mV/s to 500 mV/s).
